1 **Antibiotic inhibition of the *Plasmodium* apicoplast decreases**  
2 **haemoglobin degradation and antagonises dihydroartemisinin**  
3 **action**

4 Emily M. Crisafulli<sup>1</sup>, Amanda De Paoli<sup>2</sup>, Madel V. Tutor<sup>1</sup>, Ghizal Siddiqui<sup>2</sup>, Darren J. Creek<sup>2</sup>,  
5 Leann Tilley<sup>1</sup>, Stuart A. Ralph\*<sup>1</sup>

6 1. Department of Biochemistry and Pharmacology, Bio21 Molecular Science and  
7 Biotechnology Institute, The University of Melbourne, 30 Flemington Road, Parkville,  
8 VIC 3052, Australia.

9 2. Drug Delivery, Disposition and Dynamics, Monash Institute of Pharmaceutical Sciences,  
10 Monash University, 381 Royal Parade, Parkville, VIC 3052, Australia.

11 \* Email [saralph@unimelb.edu.au](mailto:saralph@unimelb.edu.au)

## 12 **Abstract**

13 The World Health Organisation (WHO) recommends artemisinin (ART) combinations for  
14 treatment of uncomplicated *Plasmodium falciparum* malaria. Understanding the interaction  
15 between co-administered drugs within combination therapies is clinically important to prevent  
16 unintended consequences. The WHO guidelines recommend second line treatments that  
17 combine artesunate with tetracycline, doxycycline, or clindamycin—antibiotics that target the  
18 *Plasmodium* relict plastid, the apicoplast. In addition, antibiotics can be used simultaneously  
19 against other infectious diseases, leading to their inadvertent combination with ARTs. One  
20 consequence of apicoplast inhibition is a perturbation to haemoglobin uptake and  
21 trafficking—a pathway required for activation of ART derivatives. Here, we show that  
22 apicoplast-targeting antibiotics reduce the abundance of the catalyst of ART activation (free  
23 haem) in *P. falciparum*, likely through diminished haemoglobin digestion. We demonstrate  
24 antagonism between ART and these antibiotics, suggesting that apicoplast inhibitors reduce  
25 ART activation. These data have potential clinical implications due to the reliance on—and  
26 widespread use of—both ARTs and these antibiotics in malaria endemic regions.

27 **Keywords.** *Plasmodium*; malaria; apicoplast; delayed death; antibiotics; doxycycline;  
28 clindamycin; fosmidomycin; artemisinin.

## 29 Introduction

30 Malaria remains one of the deadliest diseases affecting humankind, responsible for an  
31 estimated 409,000 deaths in 2019 [1]. Incidence and mortality rates remain high despite  
32 substantial efforts in drug and vaccine development, and the widespread use of bed nets and  
33 vector control programs in malaria endemic regions. Of particular concern in recent years has  
34 been the development of increasing resistance to the current frontline antimalarial, artemisinin  
35 (ART). The lack of comparably safe, effective, fast-acting, and affordable antimalarials in the  
36 drug pipeline signifies that efforts toward monitoring and managing parasite sensitivity to  
37 ARTs is of the utmost importance to prevent worsening of a global health emergency.

38 ART derivatives are recommended for use with a second partner drug as ART combination  
39 therapies, or ACTs, for the treatment of uncomplicated *Plasmodium falciparum* malaria [2].  
40 The rationale for this is multifaceted, combining mitigation of risks against treatment  
41 failure—due to the very short in vivo half-life (~1 h) of ART derivatives [3]—and against the  
42 development of drug resistance [4]—by hitting multiple drug targets within the parasite.

43 In some circumstances where preferred ART partner drugs are unavailable, the WHO  
44 recommends the use of artesunate (an ART derivative) plus either doxycycline or clindamycin  
45 [2]. There have also been calls to consider combining ART derivatives with antibiotics [5, 6],  
46 in part due to their dual anti-malarial and anti-bacterial activities. Currently, the WHO  
47 recommends treating patients presenting with suspected severe malaria with antibiotics in  
48 addition to malaria therapy—that is, until a bacterial infection can be excluded [2]. Use of these  
49 antibiotics in ACTs is appealing because many of them have anti-parasitic action through  
50 inhibition of the *Plasmodium* relict plastid, the apicoplast [7, 8]. Widespread use of these  
51 antibiotics in malaria endemic regions for malaria prophylaxis and the treatment of malaria or

52 bacterial infections means that they may already be circulating in patients who seek treatment  
53 with ACTs for malaria. The deliberate as well as unintended use of these drugs in combination  
54 in the field makes it important to understand their modes of action, and possible interaction,  
55 within *P. falciparum* parasites.

56 The ability of these antibiotics to kill *Plasmodium* spp. relies on the bacterial origins of the  
57 apicoplast [8]. While inhibitors that directly target apicoplast metabolism generally cause  
58 immediate parasite death [9], others that target the organelle's housekeeping functions—such  
59 as protein synthesis—cause a delayed death phenotype [10–12]. In delayed death, parasites  
60 survive the first cycle following treatment and it is not until the subsequent cycle that they  
61 cease proliferating and die. Isoprenoid synthesis is housed in the apicoplast, and antibiotic-  
62 treated parasites are depleted of the apicoplast-synthesised isoprenoid precursors required for  
63 the prenylation of trafficking machinery proteins, such as Rab proteins, resulting in a defect in  
64 the parasite's uptake and digestion of haemoglobin [13, 14]. Haem released during  
65 haemoglobin digestion is predominantly responsible for the activation of ARTs via the  
66 cleavage of the endoperoxide bond [15, 16], so inhibition of this process may have implications  
67 for efficacy of ART treatment when these drugs are combined.

68 In this study, we aimed to assess the nature of the interaction between apicoplast-targeting  
69 antibiotics and ART derivatives. We hypothesised that these antibiotics would behave  
70 antagonistically with ARTs due to their inhibition of haemoglobin uptake and subsequent  
71 reduced release of free haem. We showed that delayed death antibiotics do indeed reduce the  
72 abundance of free haem available in *P. falciparum* for ART activation in the cycle after  
73 treatment. Although combinations of ART and antibiotics have previously been tested for  
74 interactions, those assays were designed to identify effects during the first cycle of treatment,  
75 which would miss effects that manifest at the time when delayed death antibiotics exert their

76 biological impact. We instead tested for interactions in parasites that were treated with ART in  
77 the cycle after application of antibiotics. We found an antagonistic effect between these  
78 antibiotics and ART, presumably owing to the reduced activation of ART due to lower  
79 availability of free haem.

## 80 **Methods**

### 81 ***Plasmodium falciparum* culture and synchronisation**

82 *Plasmodium falciparum* 3D7 parasites were cultured as previously described [17]: at 2% (v/v)  
83 haematocrit in human O+ red blood cells (RBCs; Australian Red Cross Blood Service) and  
84 complete medium (RPMI-1640 with 25 mM sodium bicarbonate, 25 mM HEPES, 150  $\mu$ M  
85 hypoxanthine, 20  $\mu$ g/mL gentamicin (Sigma-Aldrich, G3632), and 0.5% (w/v) Albumax II  
86 (Thermo Fisher Scientific), pH 7.4); and maintained in malaria-mix gas (1% O<sub>2</sub>, 5% CO<sub>2</sub>, and  
87 94% N<sub>2</sub>) at 37°C. Ring stage synchronisation (~0–18 h p.i.) was achieved by a single treatment  
88 of infected RBCs with 5% (w/v) D-sorbitol (Sigma-Aldrich), unless otherwise indicated.

### 89 **72 h in vitro single drug sensitivity assays**

90 Synchronised ring stage 3D7 *P. falciparum* parasites (0.5% haematocrit; 1% parasitemia) were  
91 set up in V-bottom 96-well plates. Parasites were either: immediately treated with a dose  
92 gradient of atovaquone (Sigma-Aldrich, A7986), E-64 (Sigma-Aldrich, E3132), fosmidomycin  
93 (Sigma-Aldrich, F8682), proguanil (Sigma-Aldrich, G7048), or quinine (Sigma-Aldrich,  
94 145904) in complete medium; or incubated for 24 h before treatment with various  
95 concentrations of dihydroartemisinin (DHA; Chem-Supply, D3793) or WR99210 (Jacobus  
96 Pharmaceutical) in complete medium. DHA-treated parasites were washed three times with  
97 complete medium 3 h post-drug treatment. Control wells containing parasites in the absence of  
98 drug or 100  $\mu$ M chloroquine (Sigma-Aldrich, C6628) were prepared in parallel. All samples  
99 were prepared in triplicate.

100 72 h following set up, infected RBCs were incubated with lysis buffer (20 mM TRIS (pH 7.5),  
101 5 mM EDTA, 0.008% (w/v) saponin, 0.08% (v/v) Triton X-100) and SYBR Green I (Thermo

102 Fisher Scientific) for 1 h [18]. The fluorescent signal was detected using a FLUOstar Omega  
103 plate reader (BMG Labtech). Per cent survival was calculated by subtracting the background  
104 (chloroquine-treated) signal and normalising the data to the untreated control. GraphPad Prism  
105 (Version 9.1.2) was used to plot normalised data on XY scatter plots and calculate IC<sub>50</sub>s  
106 (presented as mean ± SEM).

### 107 **120 h in vitro single drug sensitivity assays**

108 Synchronised ring stage 3D7 *P. falciparum* parasites (0.5% haematocrit; 0.1% parasitemia)  
109 were set up in V-bottom 96-well plates. In the presence or absence of 5 µM geranylgeraniol  
110 (GGOH; Sigma-Aldrich, G3278), parasites were incubated in varying concentrations of  
111 clindamycin (Sigma-Aldrich, C5269) or doxycycline (Sigma-Aldrich, D3447) for 72 h, before  
112 the drugs were washed off with complete medium. Control wells were prepared (as described  
113 above, 72 h in vitro drug sensitivity assays) with chloroquine added to the positive control  
114 wells only at 72 h post-treatment. All samples were prepared in triplicate. At the 120 h time-  
115 point, infected RBCs underwent lysis, data acquisition, and analysis (as described above, 72 h  
116 in vitro drug sensitivity assays).

### 117 **Isobolograms**

118 Synchronised ring stage 3D7 *P. falciparum* parasites (0.5% haematocrit; 72 h: 1% parasitemia,  
119 or 120 h: 0.1% parasitemia) were set up in V-bottom 96-well plates. Parasites were treated with  
120 dose gradients of two drugs, producing a 96-well plate where each well consisted of a unique  
121 combination (Fig. 1A). Various pairings of atovaquone, clindamycin, DHA, doxycycline, E-  
122 64, fosmidomycin, proguanil, quinine, and WR99210 were tested. The combination of delayed  
123 death drugs with DHA were done in both the presence and absence of 5 µM GGOH. As  
124 described above, for combinations that included DHA, parasites were washed three times with

125 complete medium 3 h post-drug treatment, to mimic the short in vivo half-life of ARTs.  
126 Controls and treatment regimens for each combination were as previously described (72 h in  
127 vitro drug sensitivity assays; 120 h in vitro drug sensitivity assays; Fig. 2A to C, and S1A to  
128 C). All samples were prepared in duplicate.  
129 Parasites were lysed at the 72 or 120 h time-point (Fig. 2A to C, and S1A to C), data acquired,  
130 and per cent survival calculated for each data point (as described above, 72 h in vitro drug  
131 sensitivity assays). FIC<sub>50</sub>s were calculated [19] (Fig. 1B):

$$132 \quad \text{FIC}_{50} (\text{drug A}) = \frac{\text{IC}_{50} (\text{drug A in presence of } [x] \text{ drug B})}{\text{IC}_{50} (\text{drug A})}$$

133 and GraphPad Prism (Version 9.1.2) used to plot data on XY scatter plots.  $\Sigma$ FIC<sub>50</sub>s were  
134 calculated to quantify the drug interaction (presented as mean  $\pm$  SEM) [19]:

$$135 \quad \Sigma \text{FIC}_{50} = \text{FIC}_{50} (\text{drug A}) + \text{FIC}_{50} (\text{drug B})$$

136 Interpretation of these values utilised previously defined thresholds [19]: < 0.1, very strong  
137 synergism; 0.1–0.3, strong synergism; 0.3–0.7, synergism; 0.7–0.85, moderate synergism;  
138 0.85–0.9, slight synergism; 0.9–1.1, additive; 1.1–1.2, slight antagonism; 1.2–1.45, moderate  
139 antagonism; 1.45–3.3, antagonism; 3.3–10, strong antagonism; and > 10, very strong  
140 antagonism. GraphPad Prism (Version 9.1.2) was used to conduct unpaired *t*-tests with  
141 Welch's corrections to test statistical significance of the  $\Sigma$ FIC<sub>50</sub>s.

## 142 **Haemoglobin fractionation**

143 Ring stage 3D7 *P. falciparum* parasites were either: synchronised (as described above,  
144 *Plasmodium falciparum* culture and synchronisation) and treated with 3  $\mu$ M fosmidomycin for



145 24 h; or subjected to two D-sorbitol treatments, 8 h apart, and parasites (~8–18 h p.i.)  
146 subsequently treated with 1  $\mu$ M doxycycline or 25 nM clindamycin for 68 h. Negative controls  
147 with the appropriate vehicle were set up in parallel. Following the incubation period, RBCs  
148 were lysed with 0.15% (w/v) saponin and parasite pellets washed three times with PBS and  
149 cComplete™ mini EDTA-free protease inhibitor (Roche) at 4°C. Pellets were immediately  
150 frozen at –80°C until use.

151 The haemoglobin fractionation assay was adapted from [20, 21] with minor adjustments.  
152 Pellets were first resuspended in distilled water and sonicated for 5 min before addition of  
153 HEPES (pH 7.5; final concentration 0.1 M). Samples were centrifuged (6,200 x g, 20 min) and  
154 the pellets resuspended in distilled water before addition of 4% (w/v) sodium dodecyl sulfate  
155 (SDS; final concentration 2% (w/v)). The samples were sonicated for 5 min, then incubated at  
156 95°C for 5 min to solubilise the free haem. A solution of HEPES, NaCl, and pyridine was  
157 added (final concentration 67 mM HEPES, 0.1 M NaCl, and 8.3% (v/v) pyridine) and samples  
158 centrifuged (6,200 x g, 20 min). The supernatant—containing the free haem fraction—was  
159 transferred to a clear, flat-bottom 96-well plate. The residual pellets were then resuspended in  
160 distilled water before solubilisation with NaOH (final concentration 0.15 M). They were  
161 sonicated for 15 min before a solution of HEPES, NaCl, and pyridine was added, as described  
162 above. These samples—corresponding to the haemozoin fraction—were transferred to the 96-  
163 well plate.

164 A blank (0.2 M HEPES, 0.3 M NaOH, 0.3 M NaCl, 0.3 M HCl, 4% (w/v) SDS, and 25% (v/v)  
165 pyridine) was included in triplicate for each study. The absorbance of each fraction was  
166 measured at 405 nm using an EnSight plate reader (PerkinElmer). Samples were blank adjusted  
167 and normalised to vehicle control. Data are presented as mean fold change compared to vehicle

168 control  $\pm$  SEM, and GraphPad Prism (Version 9.1.2) was used to perform one sample *t*-tests.

169 All samples were prepared in triplicate.

## 170 **Results**

### 171 **Apicoplast inhibitors behave antagonistically with the artemisinin derivative,** 172 **dihydroartemisinin (DHA)**

173 The Chou and Talalay isobologram method was used to test the efficacy of various drug  
174 combinations [22]. Specifically, we investigated whether apicoplast inhibitors and the ART  
175 derivative, dihydroartemisinin (DHA), behave antagonistically. Concentrations giving 50 per  
176 cent inhibition of growth of sorbitol-synchronised 3D7 ring stage *P. falciparum* (IC<sub>50</sub> values)  
177 were first determined for individual drugs by means of a SYBR Green drug assay (Table S1).  
178 These were consistent with IC<sub>50</sub> values from previous reports and allowed determination of  
179 dose gradients required to establish isobolograms [23–28]. For each isobologram, parasites  
180 were treated with varying combinations of two drugs across these gradients (Fig. 1A) at the  
181 relevant dosing regimens indicated (Fig. 2A to C, and S1A to C). The fraction of the IC<sub>50</sub>  
182 concentration of each drug required to generate 50 per cent inhibition—the fractional IC<sub>50</sub>  
183 (FIC<sub>50</sub>)—was then calculated for each dose held constant across the plate and plotted to form  
184 an isobologram (Fig. 1B). The shape of the isobologram and sum of the FIC<sub>50</sub>s ( $\Sigma$ FIC<sub>50</sub>s) were  
185 used to determine the type of drug interaction for each combination using previously defined  
186 thresholds [19].

187 To first validate this methodology, synchronised ring stage parasites were treated with the well-  
188 established synergistic combination of atovaquone and proguanil (Fig. 2A). We analysed  
189 growth at 72 h post-treatment (standard timing to assess first cycle death). The isobologram  
190 indicated a moderately synergistic interaction and produced a mean  $\Sigma$ FIC<sub>50</sub> of  
191  $0.72 \pm 0.04$ —concordant with previous reports [27, 29, 30] (Fig. 2D and 3).

192 Testing the interaction of delayed death drugs (which kill in the second cycle) and DHA (which  
193 kills in the first cycle) was a complex task, so we began by substituting the delayed death drug  
194 for an apicoplast inhibitor, fosmidomycin, that causes first cycle killing. Fosmidomycin  
195 directly blocks apicoplast metabolism by inhibiting 1-deoxy-D-xylulose-5-phosphate  
196 reductoisomerase, an enzyme involved in the isoprenoid biosynthetic pathway [9]. Like other  
197 apicoplast inhibitors, fosmidomycin perturbs haemoglobin uptake, albeit in the first cycle [13].  
198 To specifically test the impact of the haemoglobin degradation defect, it was necessary to pre-  
199 treat synchronised ring stage 3D7 parasites with a dose gradient of fosmidomycin prior to DHA  
200 treatment. Further, to mimic the clinical scenario as closely as possible in an in vitro setting,  
201 we pulsed parasites with DHA for 3 h at the trophozoite stage, 24 h after pre-treatment with  
202 the apicoplast inhibitor (Fig. 2B). The experiment was designed to target the parasite life stage  
203 for which ART derivatives are most active [24, 31] and to mimic the short in vivo half-life of  
204 DHA [3]. Using this approach, fosmidomycin and DHA displayed moderate antagonism with  
205 a mean  $\Sigma\text{FIC}_{50}$  of  $1.29 \pm 0.05$  (Fig. 2D and 3). This phenotype had been observed previously  
206 [32, 33], though using a different methodology that did not explore the clinically relevant half-  
207 life of DHA [3], nor fosmidomycin-induced haemoglobin trafficking defects [13]. The  
208 antagonism between fosmidomycin and DHA is concordant with the well-established  
209 antagonistic interaction between DHA and E-64 [31]—a cysteine protease inhibitor that  
210 prevents haemoglobin degradation, presumably reducing activation of DHA by free haem [34].  
211 Consistent with this, we also saw a moderately antagonistic interaction between E-64 and  
212 DHA—with a mean  $\Sigma\text{FIC}_{50}$  of  $1.36 \pm 0.04$  (Fig. 2D and 3)—using the approach described  
213 above (Fig. 2B).

214 As a control, we substituted the apicoplast inhibitor for atovaquone, an inhibitor of  
215 cytochrome *b* that was not predicted to interact with DHA. The mean  $\Sigma\text{FIC}_{50}$  of atovaquone

216 and DHA was  $1.00 \pm 0.04$ , indicating a simple additive interaction and demonstrating that the  
217 unusual pre-treatment approach employed in our methodology did not contribute to the  
218 observed phenotype (Fig. 2D and 3).

219 A longer pre-treatment was necessary to test the interaction between delayed death drugs and  
220 DHA, as the haemoglobin trafficking defects observed when parasites are treated with these  
221 apicoplast inhibitors are evident only in the cycle subsequent to treatment [14]. Ring stage  
222 *P. falciparum* parasites were pre-treated with doxycycline or clindamycin for 72 h, to recreate  
223 the delayed death effect, and subsequently pulsed with DHA for 3 h at the trophozoite stage in  
224 the second cycle (Fig. 2C). Isobologram analysis of these data demonstrate an antagonistic and  
225 moderately antagonistic interaction between DHA and doxycycline (mean  $\Sigma\text{FIC}_{50}$  of  
226  $1.49 \pm 0.02$ ), and DHA and clindamycin (mean  $\Sigma\text{FIC}_{50}$  of  $1.44 \pm 0.10$ ), respectively (Fig. 2D  
227 and 3). The  $\Sigma\text{FIC}_{50}$ s of these combinations significantly increased—approximately 1.5-  
228 fold—from that of the additive interaction of atovaquone and DHA previously described  
229 (Fig. 3). This interaction with delayed death antibiotics was specific to DHA. The combination  
230 of delayed death drugs with WR99210—an inhibitor of dihydrofolate reductase—did not show  
231 the same antagonism (Fig. 3, and S1C and D). Mean  $\Sigma\text{FIC}_{50}$  values for doxycycline and  
232 clindamycin combined with WR99210 were  $1.21 \pm 0.05$  and  $1.16 \pm 0.05$ , respectively (Fig. 3),  
233 suggesting that this cohort of apicoplast inhibitors have a selective effect on DHA activity.  
234 This interaction appeared to reverse when parasites were supplemented with exogenous  
235 geranylgeraniol (GGOH), a polyprenol that restores haemoglobin trafficking by permitting  
236 protein prenylation in the absence of isoprenoid biosynthesis [14] (Fig. S1B and D). However,  
237 the timing of these experiments was complex as GGOH-restored parasites survive longer but  
238 still die at a later stage that is yet to be thoroughly characterised [14], complicating attempts to  
239 quantify this interaction.

## 240 **Apicoplast inhibitors reduce the abundance of haemoglobin degradation by-products**

241 To determine if the observed antagonistic interactions between apicoplast inhibitors and DHA  
242 were indeed due to reduced DHA activation, we sought to examine the effects of these  
243 antibiotics on the downstream products of haemoglobin digestion. Trafficking of haemoglobin  
244 is perturbed in parasites treated with fosmidomycin [13] or delayed death drugs [14], though  
245 the effect on by-products of haemoglobin digestion—free haem and haemozoin—has yet to be  
246 explored. We quantified the effects of fosmidomycin, doxycycline, and clindamycin on the  
247 abundance of these by-products in *P. falciparum* using a haem fractionation method, whereby  
248 pyridine is used to indirectly quantify haem products [20, 21]. The delayed death drugs,  
249 doxycycline and clindamycin, both significantly reduced haemozoin abundance in trophozoite  
250 parasites 72 h following treatment—a 1.3- ( $p = 0.0215$ ) and 1.7-fold ( $p = 0.0416$ ) reduction  
251 compared to the vehicle control, respectively (Fig. 4B). Fosmidomycin treatment caused a 1.5-  
252 fold reduction in haemozoin abundance in the same cycle as treatment. Though these latter  
253 changes were not statistically significant ( $p = 0.0854$ ) (Fig. 4A), the magnitude of reduction is  
254 similar to that seen for other inhibitors of haemozoin formation assayed using the same  
255 methodology [20, 21]. While haemozoin appears reduced in abundance, the effect on free haem  
256 appears less stark for both fast-acting and delayed death apicoplast inhibitors (Fig. 4).  
257 However, this may be explained by it being a labile and toxic by-product of haemoglobin  
258 digestion that is quickly converted into chemically inert haemozoin by the parasite.

## 259 Discussion

260 Combining drugs to enhance potency and reduce the risk of antimalarial resistance is a central  
261 plank in the strategies for malaria treatment. A notable example is the pairing of atovaquone  
262 with proguanil, a highly synergistic combination used for prophylaxis and treatment, frequently  
263 sold under the brand name Malarone [2, 29]. However, there are many documented examples  
264 of suboptimal antimalarial combinations [35], making choice of drug combinations key for  
265 effective treatment and reduced risk of drug resistance. Here, we demonstrate that antibiotics  
266 targeting the *P. falciparum* apicoplast behave antagonistically with the ART derivative, DHA,  
267 when the antibiotics are administered in the cycle before DHA. We propose that this interaction  
268 is underpinned by an antibiotic-mediated reduction in free haem that reduces the activation of  
269 DHA necessary for cytotoxicity (Fig. 5).

270 Previous studies have mapped the effects of apicoplast inhibition in asexual *P. falciparum*  
271 parasites—from impeding IPP biosynthesis to downstream perturbation of haemoglobin uptake  
272 [13, 14, 36]. Isoprenoids have multiple cellular fates, though the proximate cause of parasite  
273 death through antibiotic treatment results from reduced prenylation of trafficking proteins,  
274 potentially through Rab proteins involved in haemoglobin trafficking to the DV [13, 14]  
275 (Fig. 5A). This prevents anchoring to vesicle membranes; and is associated with the aberrant  
276 uptake of haemoglobin from the host RBC and fragmentation of the DV [13, 14] (Fig. 5B).  
277 Further, delayed death drugs reduce the abundance of haemoglobin-like peptides in the cycle  
278 following treatment [14], consistent with our finding that free haem and haemozoin levels are  
279 lowered at this timepoint. Our data also demonstrate a reduction in abundance of these by-  
280 products by fosmidomycin—a fast-acting apicoplast inhibitor—suggesting that reduced  
281 haemoglobin degradation is an inevitable downstream effect of apicoplast inhibition in the  
282 asexual blood stages.

283 We hypothesise that this reduced release of free haem is the root cause of the antagonism  
284 between these antibiotics and DHA (Fig. 5). Consistent with this interpretation of the data is  
285 the antagonistic interaction observed between the cysteine protease inhibitor, E-64, and  
286 DHA—one that has been reported previously [31]. Indeed, a similar interaction has also been  
287 reported for another haemoglobin degradation inhibitor (the cysteine protease inhibitor, N-  
288 acetyl-L-leucyl-L-leucyl-L-norleucinal, or ALLN) [16]. In both studies, antagonism was  
289 attributed to a haem-mediated reduction in ART activation. This antagonistic interaction with  
290 apicoplast-inhibiting antibiotics may also extend to other ART-like compounds in the drug  
291 pipeline that similarly rely on free haem for activation—a notable example being ozonides  
292 [37, 38], the activation of which is directly inhibited by E-64 [39].

293 The antagonistic interaction between the fast-acting apicoplast inhibitor, fosmidomycin, and  
294 DHA described here is consistent with prior reports [32, 33]. By contrast, findings vary when  
295 testing the interaction between delayed death drugs and ART derivatives, although to our  
296 knowledge, such studies are restricted to analyses of interactions in the same cycle, which  
297 would ignore the impact of delayed death. For example, *in vitro* studies have reported  
298 interactions ranging from additivity [40–43] to synergy [42]; while there is a single *in vivo*  
299 report of synergy [44]. However, these studies were conducted using growth assays where the  
300 ART and antibiotic were administered at the same time and/or were terminated before the  
301 delayed death effect would have manifested. It is probable then that any effect captured results  
302 from the influence of secondary targets within the parasite, or only capture killing based on the  
303 very start of inhibition due to the antibiotic. Our experimental design specifically incorporates  
304 the delay in onset of the haemoglobin trafficking defect [14].

305 While combination treatment options would normally involve the simultaneous administration  
306 of ART with an antibiotic, several treatment regimens could mirror a scenario in which ART



307 is present in the cell at a time where delayed death is relevant. One scenario that presents is the  
308 purposeful use of apicoplast inhibitors and ARTs in combination. The WHO currently  
309 recommends treating patients presenting with an unknown illness with antibiotics in addition  
310 to antimalarials—that is, until a bacterial infection can be excluded [2]. Antibiotics can also be  
311 used as partner drugs in ACTs: calls for these to be considered as frontline therapies have been  
312 made due to the added benefit that comes by concurrently treating any present bacterial  
313 infections prevalent in malaria endemic regions [5, 6]. While pre-treatment with antibiotics is  
314 not done purposefully in these instances, the need for multiple doses and the longevity of the  
315 antibiotic mode of action means that ultimately a similar “pre-treatment” scenario would  
316 eventuate, for example in the second or later dose of a combination therapy.

317 The widespread use of antibiotics in regions with high malaria transmission presents another—  
318 more complex—scenario whereby these drugs are combined inadvertently. Use of apicoplast-  
319 targeting antibiotics in mass drug administration efforts to treat bacterial infections in malaria  
320 endemic regions is one such situation—a notable example being administration of  
321 azithromycin for trachoma [45]. Azithromycin would consequently be circulating in patients  
322 seeking treatment for malaria infections with ACTs in these regions. There are also  
323 documented, and presumably many more undocumented, cases where non-compliance with a  
324 prescribed course of prophylactic doxycycline (which is rather commonplace [46–48]) results  
325 in a malaria infection [49]—an infection that will presumably be treated with an ACT. Both  
326 scenarios create conditions for possible suboptimal activation of the ART component of the  
327 ACT.

328 The many possible contributors (e.g. ART resistance) make it very difficult to deconvolve the  
329 root cause of any treatment failure and attribute it to this apicoplast drug interaction. However,  
330 clinical trial data—while presenting extremely varied reports of efficacy—suggest treatment

331 failure is a very real possibility. A number of clinical trials report combinations of apicoplast  
332 inhibitors and ART derivatives that produced inferior cure rates and increased rates of  
333 recrudescence and treatment failure compared to other therapies [50–64] (Table 1).

334 Arguably of greater global concern is that the combination of ART and apicoplast drugs could  
335 expose parasites to suboptimal concentrations of activated ART, conceivably worsening the  
336 already alarming spread of ART resistance and ART treatment failure that is currently  
337 occurring in South-East Asia [1]. There are several reports of modulation of ART sensitivity  
338 associated with mutations in or upstream of genes for apicoplast proteins, both in the field  
339 [65, 66] and in cultured parasites [67]. The significance of this is so far unclear, but one  
340 potential role could be through changes to apicoplast metabolism that impact isoprenoid  
341 synthesis and thus haemoglobin uptake (Fig. 5C). Given the almost ubiquitous use of ACTs  
342 throughout the malaria endemic world and the recent emergence of ART resistance in sub-  
343 Saharan Africa [68, 69], protecting against the rise of resistance elsewhere is key to avoid the  
344 worsening of malaria as a global health challenge.

345 The clinical uses of apicoplast-targeting antibiotics mean that they are often either purposefully  
346 or inadvertently used in combination with ART derivatives in the field. Although extrapolation  
347 of clinical relevance from in vitro data should be done carefully, these data flag potential  
348 concerns against combining ARTs with apicoplast-inhibiting antibiotics and reinforce the need  
349 to consider the molecular modes of action of any drugs used in combination in the field.

## 350 **Acknowledgments**

351 We are grateful to Geoffrey I. McFadden, Christopher D. Goodman, Stanley C. Xie (University  
352 of Melbourne), Kit Kennedy (Weill Cornell Medicine), Matthew P. Challis (Monash Institute  
353 of Pharmaceutical Sciences), and Christina Spry (The Australian National University) for  
354 helpful discussions. We thank Jacobus Pharmaceutical for the kind gift of WR99210 and the  
355 Australian Red Cross Blood Service for donation of red blood cells for in vitro culturing of  
356 parasites.

357 This study was funded through grants from the Australian National Health and Medical  
358 Research Council (Grant #1181336, 1139884 and #1163235).

359 We also wish to acknowledge the Traditional Custodians of the lands on which this project was  
360 conducted, the Wurundjeri People of the Kulin nation.

361 **Conflict of interest statement.** Nil.

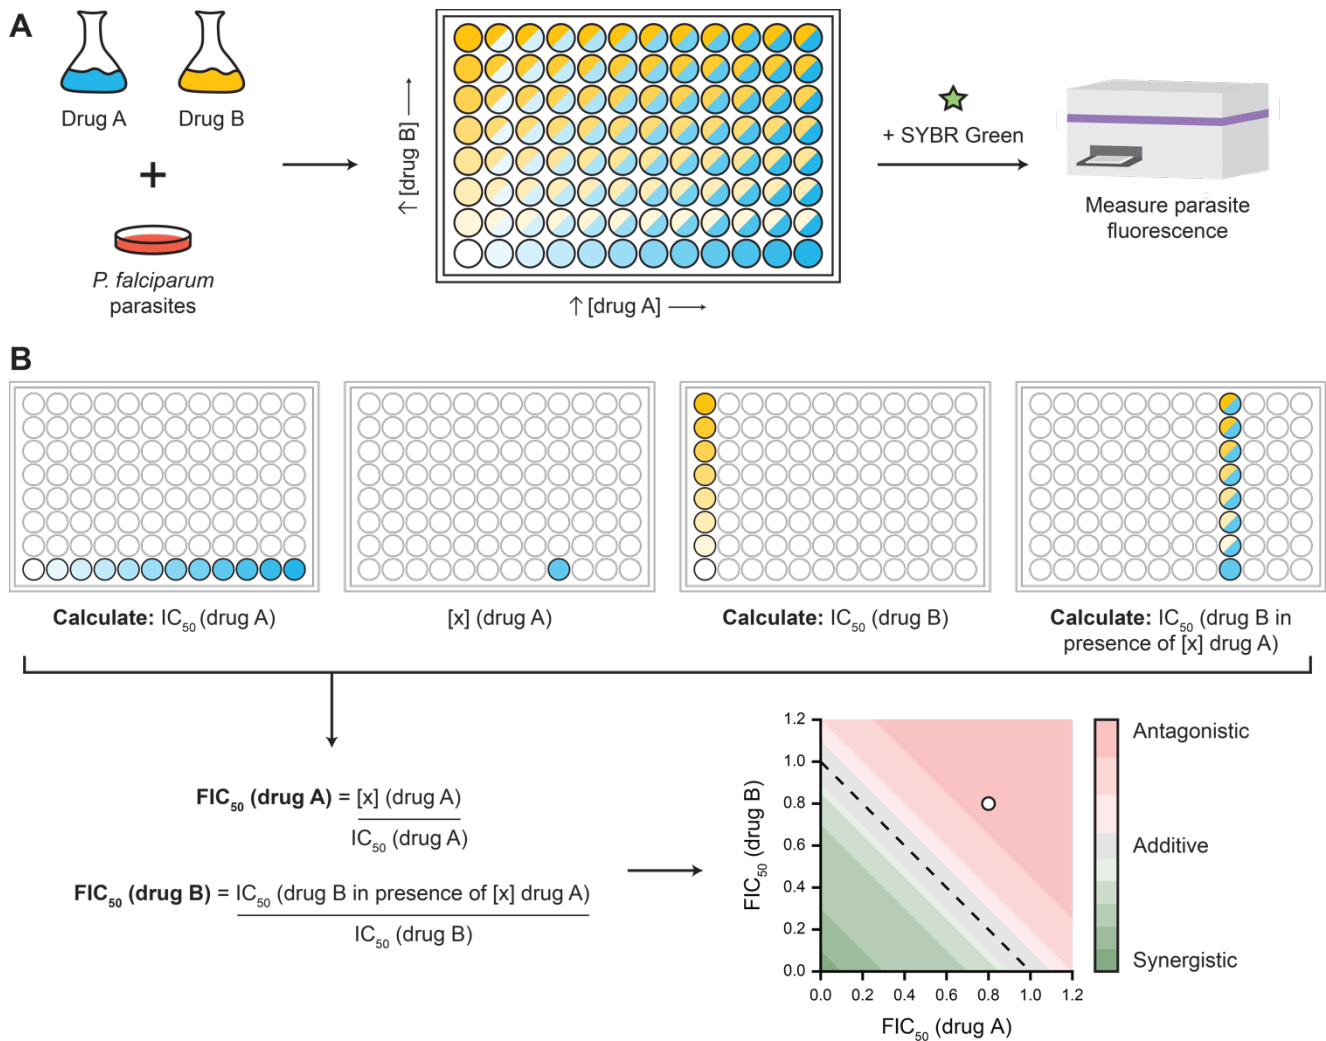

362

363 **Fig 1. Drug interactions were determined by isobologram analysis.** A) Schematic of the  
 364 isobologram set-up pipeline, whereby 3D7 *Plasmodium falciparum* ring stage parasites were  
 365 added to a V-bottom 96-well plate containing dose gradients of two drugs (blue, yellow).  
 366 Following drug incubation, parasites were lysed and stained with SYBR Green for 1 h before  
 367 fluorescent signal was detected using a microplate reader. B) Isobologram data analysis  
 368 pipeline required calculation of fractional  $IC_{50}$ s ( $FIC_{50}$ s) to be plotted on an XY scatter plot.  
 369 Drug combinations were evaluated to be synergistic (green), additive (grey), or antagonistic  
 370 (red) based on previously defined thresholds [19].

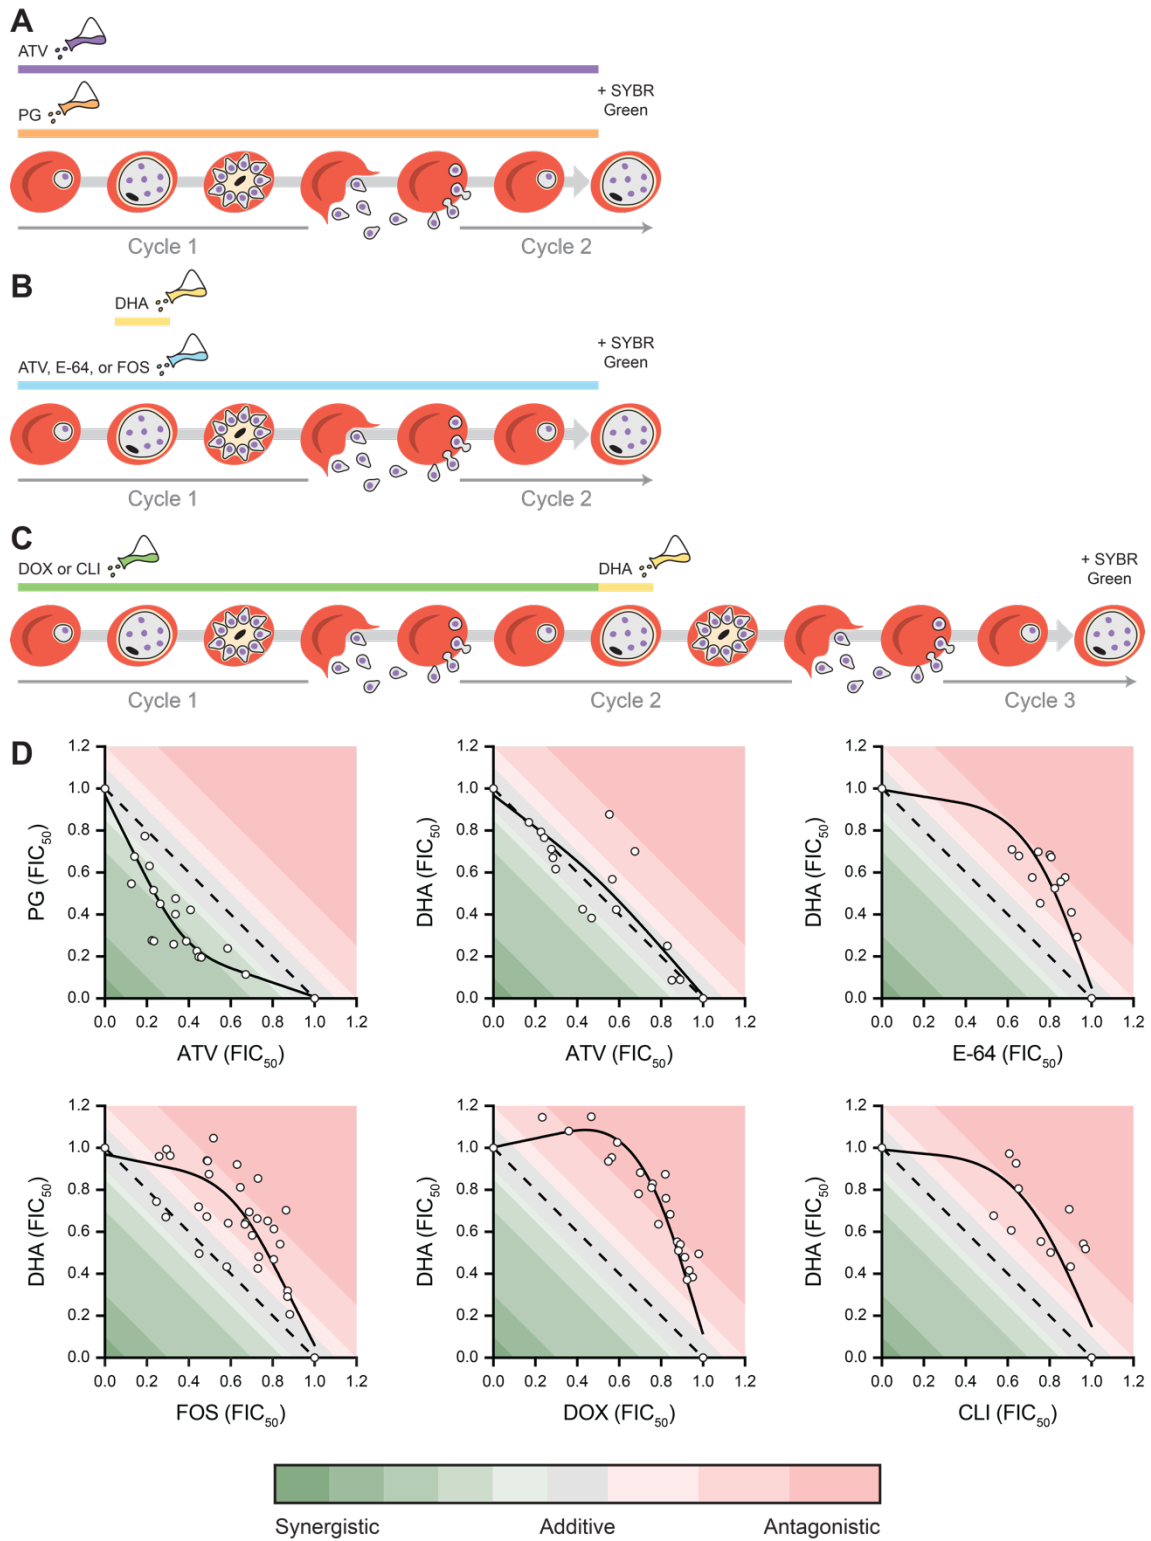

371

372 **Fig 2. Normalised isobolograms demonstrating antagonism between apicoplast inhibitors**  
373 **and dihydroartemisinin (DHA).** A–C) Schematic of the treatment regimen of 3D7  
374 *Plasmodium falciparum* ring stage parasites in the set-up of D) isobolograms. Parasites were  
375 either: A) treated with dose gradients of atovaquone (ATV) and proguanil (PG) for 72 h;  
376 B) pre-treated for 24 h with ATV, E-64, or fosmidomycin (FOS); or C) pre-treated for 72 h  
377 with doxycycline (DOX) or clindamycin (CLI). Pre-treated parasites were pulsed with a dose  
378 gradient of DHA for 3 h. Parasites were lysed and stained with SYBR Green at A and B) 72 h  
379 or C) 120 h post-initial drug treatment. Fractional IC<sub>50</sub>s (FIC<sub>50</sub>s) are presented (n ≥ 3).  
380 Interaction thresholds as previously defined [19].

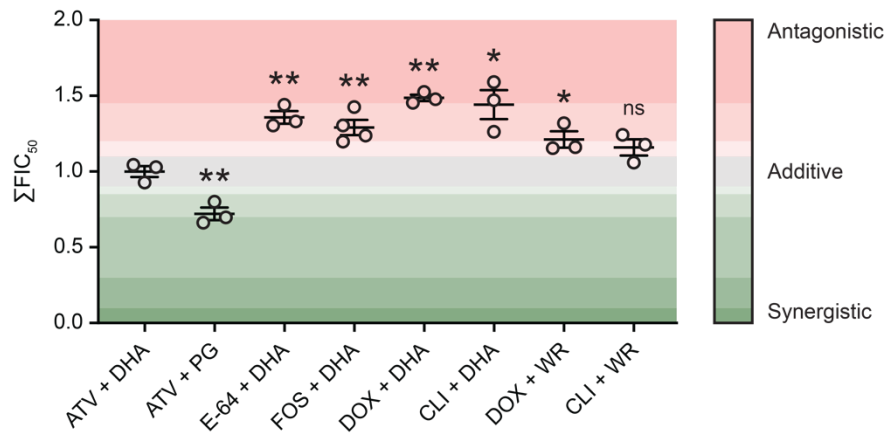

| Drug combination | $\Sigma FIC_{50}$ (mean $\pm$ SEM) | Interaction         |
|------------------|------------------------------------|---------------------|
| ATV + DHA        | 1.00 $\pm$ 0.04                    | Additive            |
| ATV + PG         | 0.72 $\pm$ 0.04**                  | Moderate synergism  |
| E-64 + DHA       | 1.36 $\pm$ 0.04**                  | Moderate antagonism |
| FOS + DHA        | 1.29 $\pm$ 0.05**                  | Moderate antagonism |
| DOX + DHA        | 1.49 $\pm$ 0.02**                  | Antagonism          |
| CLI + DHA        | 1.44 $\pm$ 0.10*                   | Moderate antagonism |
| DOX + WR         | 1.21 $\pm$ 0.05*                   | Moderate antagonism |
| CLI + WR         | 1.16 $\pm$ 0.05                    | Slight antagonism   |

381

382 **Fig 3. Mean  $\Sigma FIC_{50}$ s demonstrating antagonism between apicoplast inhibitors and**  
 383 **dihydroartemisinin (DHA).** 3D7 *Plasmodium falciparum* ring stage parasites were either:  
 384 treated with atovaquone (ATV) and proguanil (PG); pre-treated for 24 h with ATV, E-64, or  
 385 fosmidomycin (FOS); or pre-treated for 72 h with doxycycline (DOX) or clindamycin (CLI).  
 386 Pre-treated parasites were pulsed with a dose gradient of DHA for 3 h or WR99210 (WR) for  
 387 48 h. Parasites were lysed and stained with SYBR Green at 72 or 120 h. Data are presented as  
 388 mean  $\pm$  SEM ( $n \geq 3$ ). Unpaired *t*-tests with Welch's corrections were performed: \* $p \leq 0.05$ ,  
 389 \*\* $p \leq 0.01$ . Interaction thresholds as previously defined [19].

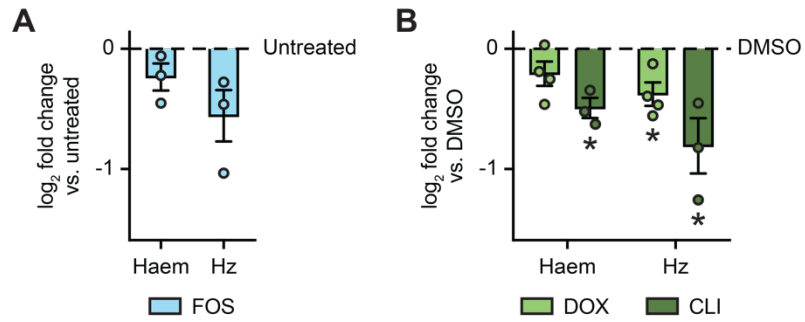

390

391 **Fig 4. Apicoplast inhibitors reduce the abundance of haemoglobin degradation by-**

392 **products.** 3D7 *Plasmodium falciparum* ring stage parasites were treated with vehicle or:

393 A) 3 μM fosmidomycin (FOS) for 24 h (~24–42 h p.i.); or B) 1 μM doxycycline (DOX) or

394 25 nM clindamycin (CLI) for 68 h (~76–86 h p.i.). Parasites were harvested and sequentially

395 fractionated to determine the relative levels of free haem and haemozoin (Hz). Data were

396 normalised to the vehicle control and are presented as mean log<sub>2</sub> fold change ± SEM (n ≥ 3).

397 One sample *t*-tests were performed: \*p ≤ 0.05.



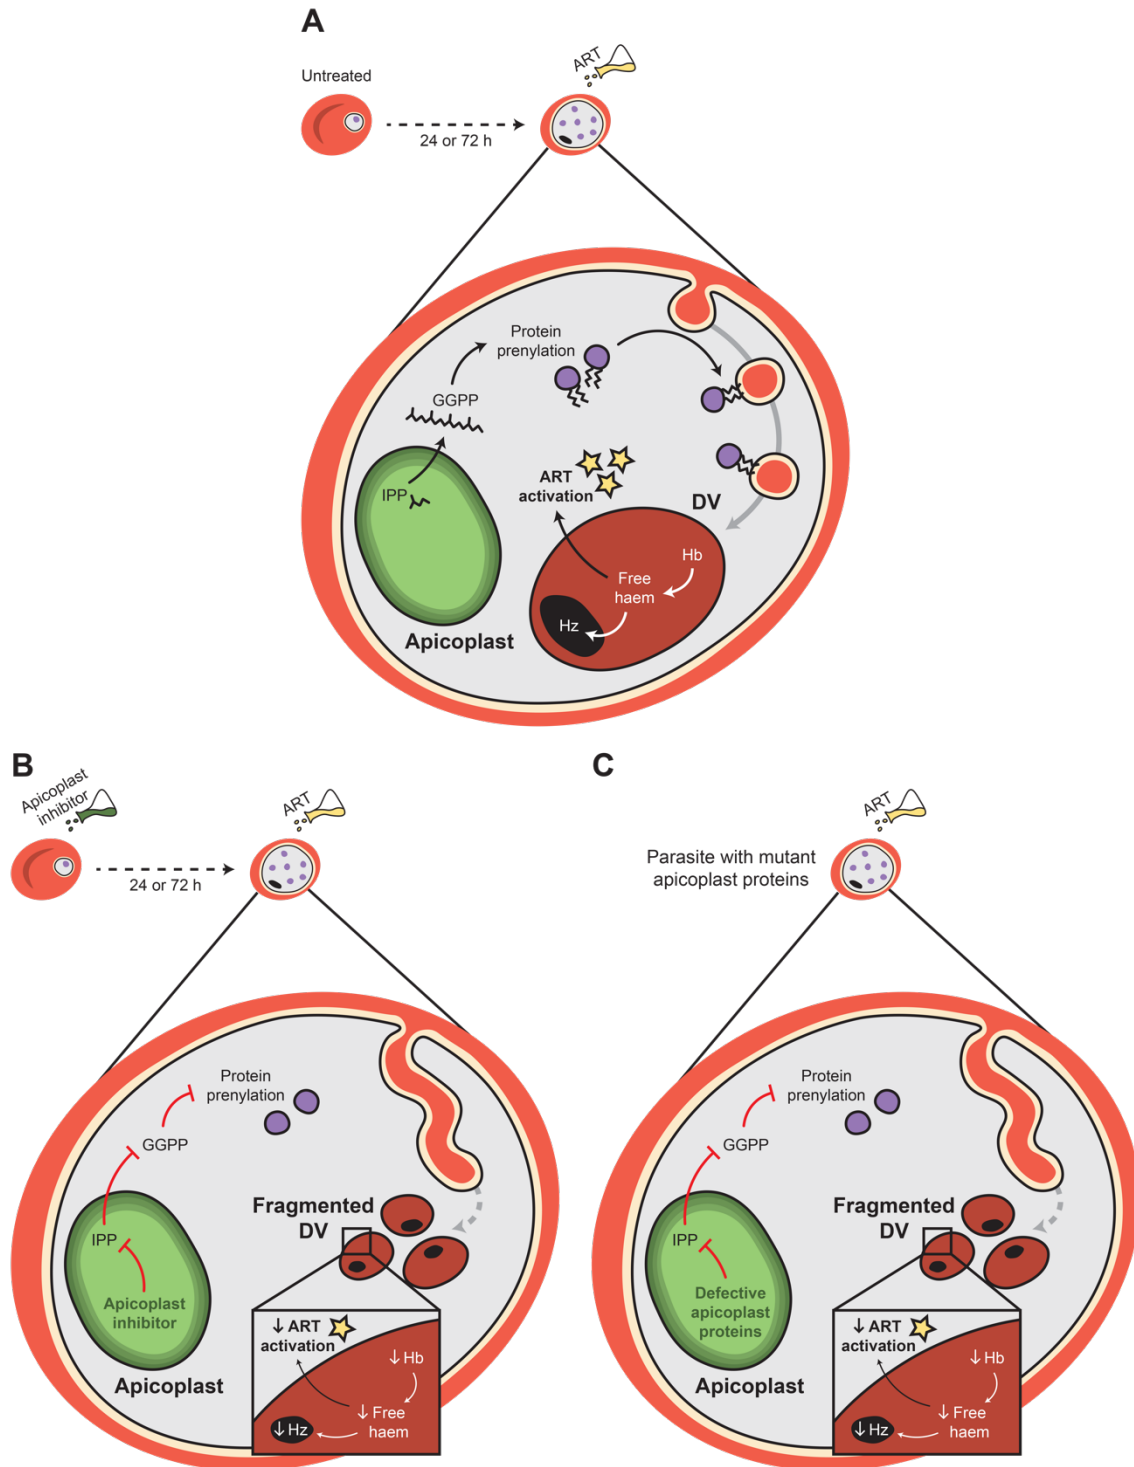

399 **Fig 5. Model of apicoplast inhibition of isoprenoid biosynthesis decreasing haemoglobin**  
400 **(Hb) degradation and antagonising artemisinin (ART).** A) In the absence of apicoplast  
401 inhibition, ART is activated by a product of Hb degradation—free haem—generated in the  
402 digestive vacuole (DV). Hb trafficking and degradation is dependent on the prenylation of  
403 trafficking proteins, a process that itself relies on production of the isoprenoid precursor,  
404 isopentenyl pyrophosphate (IPP), in the apicoplast. B) Apicoplast inhibition—both by fast-  
405 acting direct inhibitors of isoprenoid biosynthesis (24 h) and delayed death antibiotics (72 h)—  
406 reduces isoprenoid biosynthesis, preventing formation of geranylgeranyl pyrophosphate  
407 (GGPP), which forms the prenyl group on trafficking proteins required for Hb uptake and  
408 trafficking to the DV. In the absence of prenylated trafficking proteins, the cytostome becomes  
409 elongated and the DV fragmented. Hb degradation is reduced, reducing the abundance of free  
410 haem and haemozoin (Hz), and, subsequently, the activation of ART. C) Mutations in genes  
411 for apicoplast proteins reduce apicoplast metabolic processes, such as isoprenoid biosynthesis.  
412 In a similar fashion to drug inhibition, these mutations reduce prenylation and perturb  
413 haemoglobin uptake, such that there is less free haem available to activate ART.

414 **Table 1. Summary of findings from clinical studies that combined apicoplast inhibitors**  
 415 **with artemisinin derivatives<sup>a</sup>.**

| Study | Apicoplast inhibitor + artemisinin derivative |                                                     | Control                         |                                                    |
|-------|-----------------------------------------------|-----------------------------------------------------|---------------------------------|----------------------------------------------------|
|       | Drugs                                         | Finding                                             | Drug(s)                         | Finding                                            |
| [54]  | Azithromycin + artemether                     | 14.8% cure rate <sup>b</sup>                        | N/A                             | N/A                                                |
| [55]  | Azithromycin + artesunate                     | 30% recrudescence rate                              | Artesunate monotherapy          | 30% recrudescence rate                             |
| [56]  | Azithromycin + artesunate                     | 56% cure rate                                       | Artesunate monotherapy          | 44% cure rate                                      |
|       |                                               |                                                     | Mefloquine + artesunate         | 98% cure rate                                      |
| [60]  | Azithromycin + artesunate                     | 88.9–92% cure rate                                  | Azithromycin + quinine          | 73.3–92% cure rate                                 |
| [61]  | Azithromycin + artesunate                     | 58% recrudescence rate (of those, 32% failure rate) | Lumefantrine + artemether       | 20% recrudescence rate (of those, 9% failure rate) |
| [63]  | Azithromycin + artesunate                     | 94.6% cure rate                                     | Lumefantrine + artemether       | 97% cure rate                                      |
| [64]  | Azithromycin + artesunate                     | 96.7% cure rate                                     | Artesunate monotherapy          | 90% cure rate                                      |
| [57]  | Azithromycin + dihydroartemisinin             | 69.7% cure rate                                     | Mefloquine + dihydroartemisinin | 100% cure rate                                     |
| [59]  | Clindamycin + artesunate                      | 87% cure rate                                       | Clindamycin + quinine           | 94% cure rate                                      |
| [54]  | Doxycycline + artemether                      | 53.3% cure rate                                     | N/A                             | N/A                                                |

|      |                               |                                                                        |                             |                                                                        |
|------|-------------------------------|------------------------------------------------------------------------|-----------------------------|------------------------------------------------------------------------|
| [52] | Doxycycline +<br>artemisinin  | 67%<br>recrudescence<br>rate<br><br>3 cases of<br>treatment<br>failure | Quinine<br>monotherapy      | 16%<br>recrudescence<br>rate<br><br>1 case of<br>treatment<br>failure  |
|      |                               |                                                                        | Quinine +<br>artemisinin    | 28%<br>recrudescence<br>rate<br><br>0 cases of<br>treatment<br>failure |
| [51] | Doxycycline +<br>artesunate   | 80% cure rate                                                          | Doxycycline +<br>mefloquine | 96% cure rate                                                          |
| [58] | Fosmidomycin +<br>artesunate  | 100% cure rate                                                         | N/A                         | N/A                                                                    |
| [50] | Tetracycline +<br>artemisinin | 9.5%<br>recrudescence<br>rate                                          | Artemisinin<br>monotherapy  | 10–50%<br>recrudescence<br>rate                                        |
| [53] | Tetracycline +<br>artesunate  | 80% cure rate                                                          | Tetracycline +<br>quinine   | 77% cure rate                                                          |
| [62] | Tetracycline +<br>artesunate  | 95.5% cure<br>rate                                                     | Tetracycline +<br>quinine   | 91.1% cure<br>rate                                                     |

416 <sup>a</sup> Metrics defined by the original authors are presented here. These are internally consistent but  
 417 vary between studies.

418 <sup>b</sup> Attributed to possible inadequate azithromycin dosage.

## 419 **References**

- 420 1. World Health Organization. World malaria report 2020: 20 years of global progress and  
421 challenges. Geneva: World Health Organization, **2020**.
- 422 2. World Health Organization. WHO Guidelines for malaria. Geneva: World Health  
423 Organization, **2021**.
- 424 3. White NJ. Qinghaosu (artemisinin): the price of success. *Science* **2008**; 320(5874):330–4.
- 425 4. White NJ. Preventing antimalarial drug resistance through combinations. *Drug Resist Updat*  
426 **1998**; 1(1):3–9.
- 427 5. Noedl H. ABC – antibiotics-based combinations for the treatment of severe malaria? *Trends*  
428 *Parasitol* **2009**; 25(12):540–4.
- 429 6. Gaillard T, Boxberger M, Madamet M, Pradines B. Has doxycycline, in combination with  
430 anti-malarial drugs, a role to play in intermittent preventive treatment of *Plasmodium*  
431 *falciparum* malaria infection in pregnant women in Africa? *Malar J* **2018**; 17(1):469.
- 432 7. Geary TG, Jensen JB. Effects of antibiotics on *Plasmodium falciparum* in vitro. *Am J Trop*  
433 *Med Hyg* **1983**; 32(2):221–5.
- 434 8. Goodman CD, Su V, McFadden GI. The effects of anti-bacterials on the malaria parasite  
435 *Plasmodium falciparum*. *Mol Biochem Parasitol* **2007**; 152(2):181–91.
- 436 9. Jomaa H, Wiesner J, Sanderbrand S, et al. Inhibitors of the nonmevalonate pathway of  
437 isoprenoid biosynthesis as antimalarial drugs. *Science* **1999**; 285(5433):1573–6.
- 438 10. Dahl EL, Rosenthal PJ. Multiple antibiotics exert delayed effects against the *Plasmodium*  
439 *falciparum* apicoplast. *Antimicrob Agents Chemother* **2007**; 51(10):3485–90.
- 440 11. Goodman CD, Pasaje CFA, Kennedy K, McFadden GI, Ralph SA. Targeting protein  
441 translation in organelles of the Apicomplexa. *Trends Parasitol* **2016**; 32(12):953–65.

- 442 12. Kennedy K, Crisafulli EM, Ralph SA. Delayed death by plastid inhibition in apicomplexan  
443 parasites. *Trends Parasitol* **2019**; 35(10):747–59.
- 444 13. Howe R, Kelly M, Jimah J, Hodge D, Odom AR. Isoprenoid biosynthesis inhibition  
445 disrupts Rab5 localization and food vacuolar integrity in *Plasmodium falciparum*. *Eukaryotic*  
446 *Cell* **2013**; 12(2):215–23.
- 447 14. Kennedy K, Cobbold SA, Hanssen E, et al. Delayed death in the malaria parasite  
448 *Plasmodium falciparum* is caused by disruption of prenylation-dependent intracellular  
449 trafficking. *PLoS Biol* **2019**; 17(7):e3000376.
- 450 15. Meshnick SR, Taylor TE, Kamchonwongpaisan S. Artemisinin and the antimalarial  
451 endoperoxides: from herbal remedy to targeted chemotherapy. *Microbiological Reviews* **1996**;  
452 60(2):301–15.
- 453 16. Klonis N, Crespo-Ortiz MP, Bottova I, et al. Artemisinin activity against *Plasmodium*  
454 *falciparum* requires hemoglobin uptake and digestion. *Proc Natl Acad Sci U S A* **2011**;  
455 108(28):11405–10.
- 456 17. Trager W, Jensen JB. Human malaria parasites in continuous culture. *Science* **1976**;  
457 193(4254):673–5.
- 458 18. Smilkstein M, Sriwilaijaroen N, Kelly JX, Wilairat P, Riscoe M. Simple and inexpensive  
459 fluorescence-based technique for high-throughput antimalarial drug screening. *Antimicrob*  
460 *Agents Chemother* **2004**; 48(5):1803–6.
- 461 19. Chou TC. Theoretical basis, experimental design, and computerized simulation of  
462 synergism and antagonism in drug combination studies. *Pharmacol Rev* **2006**; 58(3):621–81.
- 463 20. Combrinck JM, Fong KY, Gibhard L, Smith PJ, Wright DW, Egan TJ. Optimization of a  
464 multi-well colorimetric assay to determine haem species in *Plasmodium falciparum* in the  
465 presence of anti-malarials. *Malar J* **2015**; 14:253.

- 466 21. Birrell GW, Challis MP, De Paoli A, et al. Multi-omic characterization of the mode of  
467 action of a potent new antimalarial compound, JPC-3210, against *Plasmodium falciparum*. Mol  
468 Cell Proteomics **2020**; 19(2):308–25.
- 469 22. Chou TC, Talalay P. Quantitative analysis of dose-effect relationships: the combined  
470 effects of multiple drugs or enzyme inhibitors. *Advances in Enzyme Regulation* **1984**;  
471 22:27–55.
- 472 23. Liu J, Istvan ES, Gluzman IY, Gross J, Goldberg DE. *Plasmodium falciparum* ensures its  
473 amino acid supply with multiple acquisition pathways and redundant proteolytic enzyme  
474 systems. *Proc Natl Acad Sci U S A* **2006**; 103(23):8840–5.
- 475 24. Klonis N, Xie SC, McCaw JM, et al. Altered temporal response of malaria parasites  
476 determines differential sensitivity to artemisinin. *Proc Natl Acad Sci U S A* **2013**;  
477 110(13):5157–62.
- 478 25. Sanders NG, Meyers DJ, Sullivan DJ. Antimalarial efficacy of hydroxyethylapoquinine  
479 (SN-119) and its derivatives. *Antimicrob Agents Chemother* **2014**; 58(2):820–7.
- 480 26. Uddin T, McFadden GI, Goodman CD. Validation of putative apicoplast-targeting drugs  
481 using a chemical supplementation assay in cultured human malaria parasites. *Antimicrob*  
482 *Agents Chemother* **2017**; 62(1):e011161–17.
- 483 27. Skinner-Adams TS, Fisher GM, Riches AG, et al. Cyclization-blocked proguanil as a  
484 strategy to improve the antimalarial activity of atovaquone. *Commun Biol* **2019**; 2:166.
- 485 28. Remcho TP, Guggilapu SD, Cruz P, et al. Regioisomerization of antimalarial drug  
486 WR99210 explains the inactivity of a commercial stock. *Antimicrob Agents Chemother* **2021**;  
487 65(1):e01385–20.
- 488 29. Canfield CJ, Pudney M, Gutteridge WE. Interactions of atovaquone with other antimalarial  
489 drugs against *Plasmodium falciparum* in vitro. *Exp Parasitol* **1995**; 80(3):373–81.

- 490 30. Fivelman QL, Adagu IS, Warhurst DC. Modified fixed-ratio isobologram method for  
491 studying in vitro interactions between atovaquone and proguanil or dihydroartemisinin against  
492 drug-resistant strains of *Plasmodium falciparum*. *Antimicrob Agents Chemother* **2004**;  
493 48(11):4097–102.
- 494 31. Xie SC, Dogovski C, Hanssen E, et al. Haemoglobin degradation underpins the sensitivity  
495 of early ring stage *Plasmodium falciparum* to artemisinins. *J Cell Sci* **2016**; 129(2):406–16.
- 496 32. Wiesner J, Henschker D, Hutchinson DB, Beck E, Jomaa H. In vitro and in vivo synergy  
497 of fosmidomycin, a novel antimalarial drug, with clindamycin. *Antimicrob Agents Chemother*  
498 **2002**; 46(9):2889–94.
- 499 33. Chaijaroenkul W, Pruktal P, Muhamad P, Na-Bangchang K. Assessment of in vitro  
500 antimalarial interactions between dihydroartemisinin and fosmidomycin. *The Southeast Asian*  
501 *Journal of Tropical Medicine and Public Health* **2007**; 38(5):791–5.
- 502 34. Giannangelo C, Siddiqui G, De Paoli A, et al. System-wide biochemical analysis reveals  
503 ozonide antimalarials initially act by disrupting *Plasmodium falciparum* haemoglobin  
504 digestion. *PLoS Pathog* **2020**; 16(6):e1008485.
- 505 35. Bell A. Antimalarial drug synergism and antagonism: mechanistic and clinical significance.  
506 *FEMS Microbiol Lett* **2005**; 253(2):171–84.
- 507 36. Yeh E, DeRisi JL. Chemical rescue of malaria parasites lacking an apicoplast defines  
508 organelle function in blood-stage *Plasmodium falciparum*. *PLoS Biol* **2011**; 9(8):e1001138.
- 509 37. Giannangelo C, Anderson D, Wang X, Vennerstrom JL, Charman SA, Creek DJ. Ozonide  
510 antimalarials alkylate heme in the malaria parasite *Plasmodium falciparum*. *ACS Infect Dis*  
511 **2019**; 5(12):2076–86.
- 512 38. Adoke Y, Zoleko-Manego R, Ouoba S, et al. A randomized, double-blind, phase 2b study  
513 to investigate the efficacy, safety, tolerability and pharmacokinetics of a single-dose regimen



- 514 of ferroquine with artefenomel in adults and children with uncomplicated *Plasmodium*  
515 *falciparum* malaria. *Malar J* **2021**; 20(1):222.
- 516 39. Giannangelo C, Stingelin L, Yang T, Tilley L, Charman SA, Creek DJ. Parasite-mediated  
517 degradation of synthetic ozonide antimalarials impacts in vitro antimalarial activity.  
518 *Antimicrob Agents Chemother* **2018**; 62(3):e01566–17.
- 519 40. Chawira AN, Warhurst DC. The effect of artemisinin combined with standard antimalarials  
520 against chloroquine-sensitive and chloroquine-resistant strains of *Plasmodium falciparum* in  
521 vitro. *The Journal of Tropical Medicine and Hygiene* **1987**; 90(1):1–8.
- 522 41. Fivelman QL, Walden JC, Smith PJ, Folb PI, Barnes KI. The effect of artesunate combined  
523 with standard antimalarials against chloroquine-sensitive and chloroquine-resistant strains of  
524 *Plasmodium falciparum* in vitro. *Trans R Soc Trop Med Hyg* **1999**; 93(4):429–32.
- 525 42. Ramharter M, Noedl H, Winkler H, et al. In vitro activity and interaction of clindamycin  
526 combined with dihydroartemisinin against *Plasmodium falciparum*. *Antimicrob Agents*  
527 *Chemother* **2003**; 47(11):3494–9.
- 528 43. Noedl H, Krudsood S, Leowattana W, et al. In vitro antimalarial activity of azithromycin,  
529 artesunate, and quinine in combination and correlation with clinical outcome. *Antimicrob*  
530 *Agents Chemother* **2007**; 51(2):651–6.
- 531 44. Chawira AN, Warhurst DC, Robinson BL, Peters W. The effect of combinations of  
532 qinghaosu (artemisinin) with standard antimalarial drugs in the suppressive treatment of  
533 malaria in mice. *Trans R Soc Trop Med Hyg* **1987**; 81(4):554–8.
- 534 45. World Health Organization. WHO Alliance for the global elimination of trachoma by 2020:  
535 progress report, 2019. *Weekly Epidemiological Record* **2020**; 95:349–60.
- 536 46. Watanasook C, Singharaj P, Suriyamongkol V, et al. Malaria prophylaxis with doxycycline  
537 in soldiers deployed to the Thai-Kampuchean border. *The Southeast Asian Journal of Tropical*  
538 *Medicine and Public Health* **1989**; 20(1):61–4.

- 539 47. Sánchez JL, DeFraites RF, Sharp TW, Hanson RK. Mefloquine or doxycycline prophylaxis  
540 in US troops in Somalia. *Lancet* **1993**; 341(8851):1021–2.
- 541 48. Shanks GD, Roessler P, Edstein MD, Rieckmann KH. Doxycycline for malaria prophylaxis  
542 in Australian soldiers deployed to United Nations missions in Somalia and Cambodia. *Mil Med*  
543 **1995**; 160(9):443–5.
- 544 49. Tan KR, Magill AJ, Parise ME, Arguin PM. Doxycycline for malaria chemoprophylaxis  
545 and treatment: report from the CDC expert meeting on malaria chemoprophylaxis. *Am J Trop*  
546 *Med Hyg* **2011**; 84(4):517–31.
- 547 50. Nguyen DS, Dao BH, Nguyen PD, et al. Treatment of malaria in Vietnam with oral  
548 artemisinin. *Am J Trop Med Hyg* **1993**; 48(3):398–402.
- 549 51. Looareesuwan S, Viravan C, Vanijanonta S, et al. Randomized trial of mefloquine-  
550 doxycycline, and artesunate-doxycycline for treatment of acute uncomplicated falciparum  
551 malaria. *Am J Trop Med Hyg* **1994**; 50(6):784–9.
- 552 52. Bich NN, de Vries PJ, Van Thien H, et al. Efficacy and tolerance of artemisinin in short  
553 combination regimens for the treatment of uncomplicated falciparum malaria. *Am J Trop Med*  
554 *Hyg* **1996**; 55(4):438–43.
- 555 53. Duarte EC, Fontes CJ, Gyorkos TW, Abrahamowicz M. Randomized controlled trial of  
556 artesunate plus tetracycline versus standard treatment (quinine plus tetracycline) for  
557 uncomplicated *Plasmodium falciparum* malaria in Brazil. *Am J Trop Med Hyg* **1996**;  
558 54(2):197–202.
- 559 54. Na-Bangchang K, Kanda T, Tipawangso P, et al. Activity of artemether-azithromycin  
560 versus artemether-doxycycline in the treatment of multiple drug resistant falciparum malaria.  
561 *The Southeast Asian Journal of Tropical Medicine and Public Health* **1996**; 27(3):522–5.

- 562 55. de Vries PJ, Le NH, Le TD, et al. Short course of azithromycin/artesunate against  
563 falciparum malaria: no full protection against recrudescence. *Trop Med Int Health* **1999**;  
564 4(5):407–8.
- 565 56. Krudsood S, Silachamroon U, Wilairatana P, et al. A randomized clinical trial of  
566 combinations of artesunate and azithromycin for treatment of uncomplicated *Plasmodium*  
567 *falciparum* malaria in Thailand. *The Southeast Asian Journal of Tropical Medicine and Public*  
568 *Health* **2000**; 31(4):801–7.
- 569 57. Krudsood S, Buchachart K, Chalermrut K, et al. A comparative clinical trial of  
570 combinations of dihydroartemisinin plus azithromycin and dihydroartemisinin plus mefloquine  
571 for treatment of multidrug resistant falciparum malaria. *The Southeast Asian Journal of*  
572 *Tropical Medicine and Public Health* **2002**; 33(3):525–31.
- 573 58. Borrmann S, Adegnika AA, Moussavou F, et al. Short-course regimens of artesunate-  
574 fosmidomycin in treatment of uncomplicated *Plasmodium falciparum* malaria. *Antimicrob*  
575 *Agents Chemother* **2005**; 49(9):3749–54.
- 576 59. Ramharter M, Oyakhirome S, Klouwenberg PK, et al. Artesunate-clindamycin versus  
577 quinine-clindamycin in the treatment of *Plasmodium falciparum* malaria: a randomized  
578 controlled trial. *Clin Infect Dis* **2005**; 40(12):1777–84.
- 579 60. Noedl H, Krudsood S, Chalermratana K, et al. Azithromycin combination therapy with  
580 artesunate or quinine for the treatment of uncomplicated *Plasmodium falciparum* malaria in  
581 adults: a randomized, phase 2 clinical trial in Thailand. *Clin Infect Dis* **2006**; 43(10):1264–71.
- 582 61. Sykes A, Hendriksen I, Mtove G, et al. Azithromycin plus artesunate versus artemether-  
583 lumefantrine for treatment of uncomplicated malaria in Tanzanian children: a randomized,  
584 controlled trial. *Clin Infect Dis* **2009**; 49(8):1195–201.

- 585 62. Taj A, Sharif MA, Mahmood A, Luqman M. To compare the relapse rate of artesunate with  
586 tetracycline and quinine with tetracycline in uncomplicated falciparum malaria. Pakistan  
587 Journal of Medical Sciences **2009**; 25(2):274–8.
- 588 63. Thriemer K, Starzengruber P, Khan WA, et al. Azithromycin combination therapy for the  
589 treatment of uncomplicated falciparum malaria in Bangladesh: an open-label randomized,  
590 controlled clinical trial. J Infect Dis **2010**; 202(3):392–8.
- 591 64. Phong NC, Quang HH, Thanh NX, et al. In vivo efficacy and tolerability of artesunate-  
592 azithromycin for the treatment of falciparum malaria in Vietnam. Am J Trop Med Hyg **2016**;  
593 95(1):164–7.
- 594 65. Miotto O, Amato R, Ashley EA, et al. Genetic architecture of artemisinin-resistant  
595 *Plasmodium falciparum*. Nat Genet **2015**; 47(3):226–34.
- 596 66. Miotto O, Sekihara M, Tachibana SI, et al. Emergence of artemisinin-resistant *Plasmodium*  
597 *falciparum* with kelch13 C580Y mutations on the island of New Guinea. PLoS Pathog **2020**;  
598 16(12):e1009133.
- 599 67. Zhang M, Wang C, Otto TD, et al. Uncovering the essential genes of the human malaria  
600 parasite *Plasmodium falciparum* by saturation mutagenesis. Science **2018**;  
601 360(6388):eaap7847.
- 602 68. Balikagala B, Fukuda N, Ikeda M, et al. Evidence of artemisinin-resistant malaria in Africa.  
603 N Engl J Med **2021**; 385(13):1163–71.
- 604 69. Uwimana A, Umulisa N, Venkatesan M, et al. Association of *Plasmodium falciparum*  
605 *kelch13* R561H genotypes with delayed parasite clearance in Rwanda: an open-label, single-  
606 arm, multicentre, therapeutic efficacy study. Lancet Infect Dis **2021**; 21(8): 1120–8.
